# Supplementary material
Source: publisher figshare collection journal article supplement (https://karger.figshare.com/ndownloader/files/26676341)
Supplement: Supplementary file 1 [file 26676341]

Table S1. Questionnaires used in the present study to assess heath-related quality of life, psychological disorders and work impairment in patients with HAE.

| Questionnaire | Age limit | Number of questions | Domains/ dimensions | Score system interpretation | References |
| --- | --- | --- | --- | --- | --- |
| HAE-QoL | 18 | 25 | 8 | 25-135 (25 maximum disability and 135 no disability) | Prior et al. (1) |
| SF-36 | 18 | 36 | 8 | 0-100 (0 maximum disability and 100 no disability) | McHorney et al. (2) |
| PedsQL | 2-18 | 23 | 4 | 0-100 (0 maximum disability and 100 no disability) | Varni et al. (3) |
| HADS ANXIETY | 18 | 14 | 2 | normal 0-7 borderline abnormal 8-11 abnormal 12-21 | Zigmond & Snaith (4) |
| HADS DEPRESSION |
| DASS DEPRESSION | 10 | 21 | 3 | normal 0-9 mild 10-13 moderate 14-20 severe 21-27 extremely severe more than 28 | Henry & Crawford  (5) |
| DASS  ANXIETY | normal 0-7 mild 8-9 moderate 10-14  severe 15-19 extremely severe more than 20 |
| DASS  STRESS | normal 0-14 mild 15-18 moderate 19-25 severe 26-33 extremely severe more than 34 |
| BAI | 13 | 21 | 1 | Not at all 0-10 mild 11-19 moderate 20-30 severe 31-63 | Beck et al. (6) |
| BDI | 13 | 21 | 1 | minimal 0-13 mild 14-19 moderate 20-28 severe 29-63 | Beck et al. (7) |
| CDI | 7-17 | 27 | 4 | Probable depression-greater than 17 | Kovács (8) |
| SSC | 6-14 | 35 | 4 | Suggestive stress:  1. Complete circles in 7 or more items  2. Score ≥27 in any of the factors except psychophysiological  3. Score ≥ 24 in psychophysiological  4. Total scale score ≥ 105 | Lucarelli & Lipp (9) |
| WPAI-GH | If employed | | 6 | 0-100 expressed as percentages of loss, with larger numbers indicating greater loss and lower productivity | Reilly et al. (10) |

*HAE-QoL*, Health-related quality of life questionnaire for hereditary angiodema*; SF-36*, Short Form Health Survey; *PedsQL*, Pediatric Quality of Life Inventory; *HADS*, Hospital Anxiety and Depression Scale; *DASS*, Depression Anxiety Stress Scales; *BAI*, Beck Anxiety Inventory; *BDI*, Beck Depression Inventory; *CDI*, Children’s Depression Inventory; *SSC*, Child Stress Scale; *WPAI-GH*, Work Productivity and Activity Impairment Questionnaire – General Health.
